# Supplementary material
Source: PubMed Central journal article supplement (PMC1201285)

**A**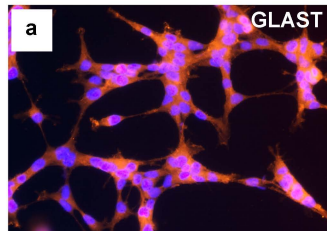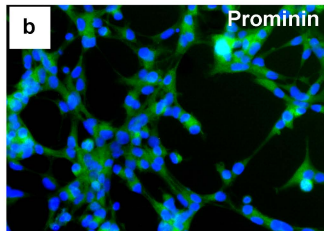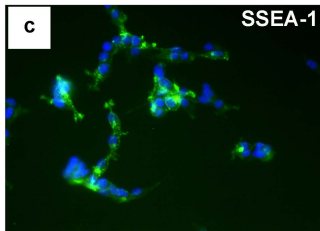**B**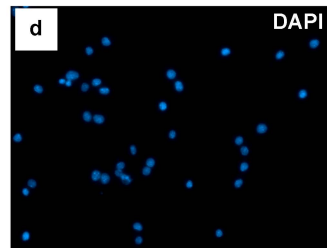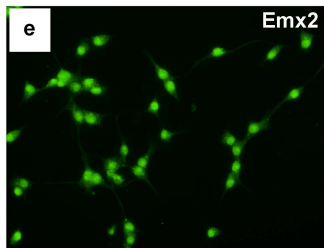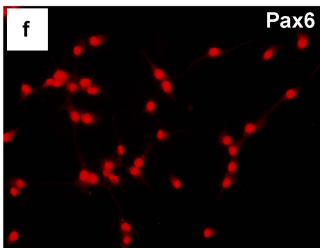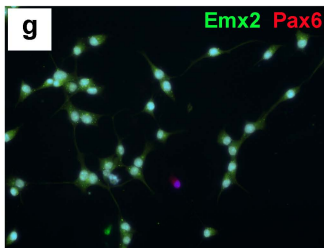

Supplement: pbio.0030283.sg001.pdf [file pbio.0030283.sg001.pdf]

Proliferation

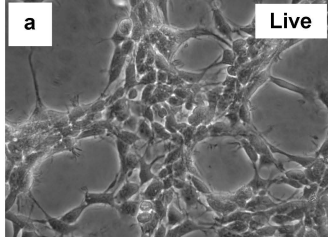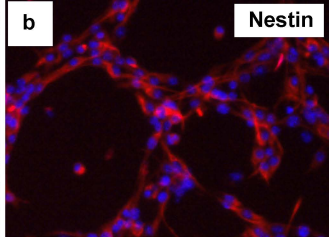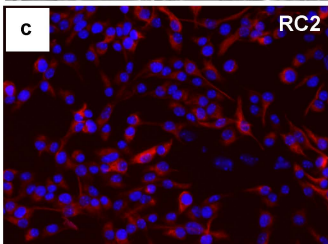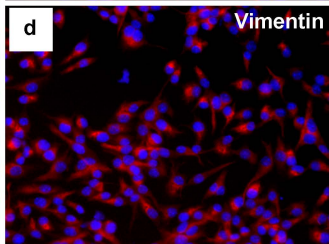

Differentiation

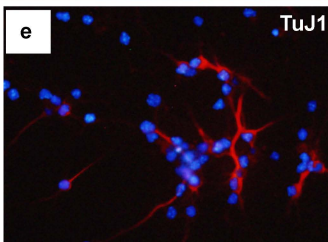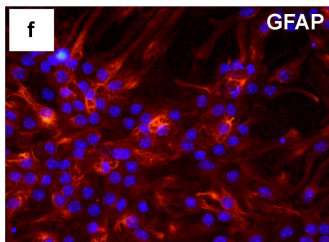

Supplement: pbio.0030283.sg003.pdf [file pbio.0030283.sg003.pdf]

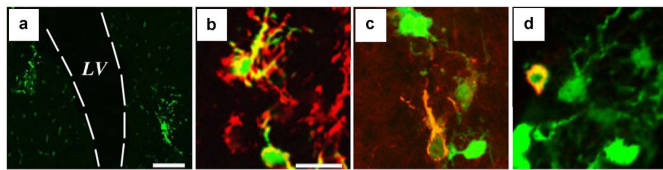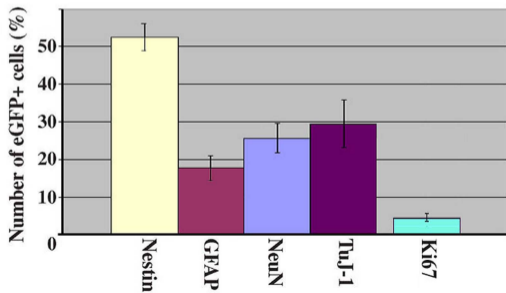

Supplement: pbio.0030283.sg004.pdf [file pbio.0030283.sg004.pdf]
